# Supplementary material for: The Resilience Journal: Exploring the Potential of Journal Interventions to Promote Resilience in University Students
Source: PubMed Central journal article supplement (PMC8526970; doi:10.3389/fpsyg.2021.702683), 2021-10-06
Supplement: Table_1.pdf [file Table_1.pdf]

## 1 Supplemental Material 1. Means, standard deviations, and pre-requirement tests.

| Variable      | Mean & Standard Deviation |                  |                  | Pre-Requirements |                |          |          |
|---------------|---------------------------|------------------|------------------|------------------|----------------|----------|----------|
|               | MV                        | AV               | total            | t-test           | Levene-test    | Skewness | Kurtosis |
| Gender        | 1.68<br>(.47)             | 1.64<br>(.49)    | 1.66<br>(.48)    | .42<br>(.677)    | 1.66<br>(.201) | -.69     | -1.56    |
| Age           | 23.58<br>(2.47)           | 23.90<br>(2.42)  | 23.74<br>(2.45)  | -.641<br>(.523)  | .10<br>(.756)  | .23      | -.217    |
| Semester      | 5.58<br>(3.23)            | 5.78<br>(3.44)   | 3.44<br>(2.06)   | -.29<br>(.771)   | .17<br>(.681)  | 1.63     | 3.09     |
| Study Program | 1.50<br>(.51)             | 1.56<br>(.50)    | 1.53<br>(.50)    | -.60<br>(.552)   | .61<br>(.436)  | -.12     | -2.03    |
| BRS           | 3.19<br>(.76)             | 3.36<br>(.60)    | 3.27<br>(.68)    | -1.25<br>(.215)  | 2.85<br>(.095) | -.47     | -.52     |
| CD-RISC       | 2.89<br>(.37)             | 2.82<br>(.39)    | 2.86<br>(.38)    | .85<br>(.400)    | .058<br>(.810) | -.22     | .36      |
| SWLS          | 5.32<br>(1.11)            | 5.37<br>(.85)    | 5.35<br>(.98)    | -.20<br>(.840)   | .92<br>(.339)  | -.59     | -.14     |
| BFI-10 N      | 2.89<br>(.89)             | 2.76<br>(.88)    | 2.83<br>(.89)    | .73<br>(.466)    | .02<br>(.886)  | .31      | -.50     |
| BFI-10 C      | 3.67<br>(.78)             | 3.61<br>(.92)    | 3.64<br>(.85)    | .35<br>(.726)    | 1.76<br>(.188) | -.58     | .31      |
| BFI-10 E      | 3.47<br>(1.07)            | 3.51<br>(1.07)   | 3.49<br>(1.07)   | -.19<br>(.852)   | .65<br>(.421)  | -.28     | -.99     |
| BFI-10 O      | 3.11<br>(1.25)            | 3.17<br>(1.06)   | 3.14<br>(1.15)   | -.26<br>(.796)   | 3.25<br>(.075) | -.05     | -1.06    |
| BFI-10 A      | 3.47<br>(.97)             | 3.31<br>(.88)    | 3.39<br>(.92)    | .87<br>(.389)    | .16<br>(.687)  | -.35     | -.36     |
| MARS          | 70.15<br>(17.45)          | 66.07<br>(18.06) | 68.11<br>(17.78) | 1.15<br>(.253)   | .33<br>(.565)  | -1.14    | 1.58     |

Note. Standard deviations (Mean & Standard Deviation) and p-values (Pre-Requirements) in parentheses; MV = Mastery Version of the Resilience Journal; AV = Attention Version of Resilience Journal; Total = both conditions combined; BRS = Brief Resilience Scale; CD-RISC = Connor-Davidson Resilience Scale; SWLS = Satisfaction with Life Scale; BFI-10 N = Big Five Inventory 10 – Neuroticism; BFI-10 C = Big Five Inventory 10 – Conscientiousness; BFI-10 E = Big Five Inventory 10 – Extraversion; BFI-10 O = Big Five Inventory 10 – Openness; BFI-10 A = Big Five Inventory 10 – Agreeableness; MARS = Monitoring of Actual Resilience State; Gender: 1 = male, 2 = female; Study Program: 1 = Bachelor; 2 = Master.
